# Supplementary material for: Effects of the 10-Valent Pneumococcal Nontypeable Haemophilus influenzae Protein D–Conjugate Vaccine on Nasopharyngeal Bacterial Colonization in Young Children: A Randomized Controlled Trial
Source: PubMed Central journal article supplement — Clin Infect Dis. 2012 Nov 1;56(3):e30–9. doi: 10.1093/cid/cis922 (PMC3540043; doi:10.1093/cid/cis922), 2012-11-01
Supplement: supp_cis922_cis922supp.pdf [file supp_cis922_cis922supp.pdf]

Supplementary Table 1. Acquisition of culturable *H. influenzae* in children (Total Vaccinated Cohort).

|                                                     | PHiD-CV group |     |                     | 7vCRM group |     |                     | Vaccine efficacy     |
|-----------------------------------------------------|---------------|-----|---------------------|-------------|-----|---------------------|----------------------|
|                                                     | n             | N   | % (95% CI)          | n           | N   | % (95% CI)          | % (95% CI)           |
| <b>Any <i>H. influenzae</i><sup>a</sup></b>         |               |     |                     |             |     |                     |                      |
| Age 11–13 mo                                        | 172           | 512 | 33.6 (29.5 to 37.9) | 83          | 256 | 32.4 (26.7 to 38.5) | -3.6 (-36.3 to 20.7) |
| Age 14–16 mo                                        | 95            | 514 | 18.5 (15.2 to 22.1) | 58          | 257 | 22.6 (17.6 to 28.2) | 18.1 (-15.6 to 41.5) |
| Age 18–20 mo                                        | 126           | 510 | 24.7 (21.0 to 28.7) | 64          | 256 | 25.0 (19.8 to 30.8) | 1.2 (-35.7 to 27.4)  |
| Age 23–25 mo                                        | 148           | 509 | 29.1 (25.2 to 33.2) | 71          | 254 | 28.0 (22.5 to 33.9) | -4.0 (-40.1 to 22.1) |
| Across all visits                                   | 391           | 515 | 75.9 (72.0 to 79.6) | 199         | 258 | 77.1 (71.5 to 82.1) | 1.6 (-17.3 to 17.2)  |
| <b>Nontypeable <i>H. influenzae</i><sup>a</sup></b> |               |     |                     |             |     |                     |                      |
| Age 11–13 mo                                        | 161           | 512 | 31.4 (27.4 to 35.7) | 78          | 255 | 30.6 (25.0 to 36.6) | -2.8 (-36.5 to 22.0) |
| Age 14–16 mo                                        | 80            | 513 | 15.6 (12.6 to 19.0) | 45          | 257 | 17.5 (13.1 to 22.7) | 10.9 (-31.3 to 38.9) |
| Age 18–20 mo                                        | 88            | 509 | 17.3 (14.1 to 20.9) | 45          | 254 | 17.7 (13.2 to 23.0) | 2.4 (-43.0 to 32.6)  |
| Age 23–25 mo                                        | 104           | 505 | 20.6 (17.1 to 24.4) | 61          | 254 | 24.0 (18.9 to 29.8) | 14.2 (-19.6 to 38.1) |
| Across all visits                                   | 367           | 515 | 71.3 (67.1 to 75.1) | 190         | 258 | 73.6 (67.8 to 78.9) | 3.2 (-15.9 to 19.0)  |

For each visit, N indicates the number of subjects with swabs cultured and n (%) indicates the number (percentage) of subjects with new acquisition of the specified bacterium. For across all visits, N indicates the number of subjects with swabs cultured after at least one visit; n (%) indicates the number (percentage) of subjects with new acquisition of the specified bacterium after at least one visit. Vaccine efficacy of PHiD-CV compared to 7vCRM was estimated as  $([1 - \text{relative risk}] \times 100)$ .<sup>a</sup> Data include only results from samples confirmed by PCR as *H. influenzae* after discrimination from *H. haemolyticus*. Samples with invalid test results were excluded from the analysis. Abbreviations: mo, months; CI, confidence interval.

Supplementary Table 2. Link between conventional culture<sup>a</sup> and PCR assay<sup>b</sup> results across visits (Total Vaccinated Cohort).

|                                           | PHiD-CV + DTPa-HBV-IPV/Hib group |           | PHiD-CV + DTPa-IPV-Hib group |           | 7vCRM + DTPa-IPV-Hib group |           |
|-------------------------------------------|----------------------------------|-----------|------------------------------|-----------|----------------------------|-----------|
|                                           | N=1042                           |           | N=1058                       |           | N=1039                     |           |
| <b><i>H. influenzae</i><sup>a,b</sup></b> | <b>Culture</b>                   |           | <b>Culture</b>               |           | <b>Culture</b>             |           |
| <b>qPCR</b>                               | Positive                         | Negative  | Positive                     | Negative  | Positive                   | Negative  |
| Positive                                  | 629 (60%)                        | 118 (11%) | 632 (60%)                    | 120 (11%) | 608 (59%)                  | 114 (11%) |
| Negative                                  | 24 (2%)                          | 271 (26%) | 23 (2%)                      | 283 (27%) | 25 (2%)                    | 292 (28%) |
|                                           | N=1106                           |           | N=1113                       |           | N=1112                     |           |
| <b><i>S. pneumoniae</i><sup>a,b</sup></b> | <b>Culture</b>                   |           | <b>Culture</b>               |           | <b>Culture</b>             |           |
| <b>qPCR</b>                               | Positive                         | Negative  | Positive                     | Negative  | Positive                   | Negative  |
| Positive                                  | 532 (48%)                        | 265 (24%) | 547 (49%)                    | 241 (22%) | 517 (47%)                  | 240 (22%) |
| Negative                                  | 4 (0%)                           | 305 (28%) | 9 (1%)                       | 316 (28%) | 4 (0%)                     | 351 (32%) |
|                                           | N=797                            |           | N=788                        |           | N=756                      |           |
| <b>Serotype 19A</b>                       | <b>Culture</b>                   |           | <b>Culture</b>               |           | <b>Culture</b>             |           |
| <b>PCR</b>                                | Positive                         | Negative  | Positive                     | Negative  | Positive                   | Negative  |
| Positive                                  | 78 (10%)                         | 86 (11%)  | 79 (10%)                     | 79 (10%)  | 80 (11%)                   | 62 (8%)   |
| Negative                                  | 1 (0%)                           | 632 (80%) | 2 (0%)                       | 628 (80%) | 2 (0%)                     | 612 (81%) |

Data are n (%), indicating the number (percentage) of swab samples with the identified category. N indicates the number of swab samples with results available for both culture and PCR. <sup>a</sup> Culture indicates results from the primary culture of the original nasopharyngeal swab (and for *H. influenzae* confirmed by PCR as true *H. influenzae*). <sup>b</sup> qPCR indicates results from real-time qPCR targeting the IgtC gene with values of  $\geq 200$  genomic equivalents per millilitre (GE/mL) defined as positive for *H. influenzae*; values of  $\geq 900$  GE/mL of IytA defined as positive for *S. pneumoniae*. <sup>c</sup> PCR indicates results from serotype-specific PCR for serotype 19A; only samples that were tested positive for IytA by qPCR and samples with available conventional culture results (including serotyping) were included.

Supplementary Table 3. Acquisition of culturable *S. pneumoniae* in children (Total Vaccinated Cohort).

|                                                      | PHiD-CV group |     |                     | 7vCRM group |     |                     |
|------------------------------------------------------|---------------|-----|---------------------|-------------|-----|---------------------|
|                                                      | n             | N   | % (95% CI)          | n           | N   | % (95% CI)          |
| <b>Any <i>S. pneumoniae</i><sup>a</sup></b>          |               |     |                     |             |     |                     |
| Age 11–13 mo                                         | 217           | 514 | 42.2 (37.9 to 46.6) | 107         | 258 | 41.5 (35.4 to 47.7) |
| Age 14–16 mo                                         | 181           | 514 | 35.2 (31.1 to 39.5) | 90          | 257 | 35.0 (29.2 to 41.2) |
| Age 18–20 mo                                         | 233           | 514 | 45.3 (41.0 to 49.7) | 125         | 258 | 48.4 (42.2 to 54.7) |
| Age 23–25 mo                                         | 245           | 512 | 47.9 (43.5 to 52.3) | 110         | 257 | 42.8 (36.7 to 49.1) |
| Across all visits                                    | 457           | 515 | 88.7 (85.7 to 91.3) | 224         | 258 | 86.8 (82.1 to 90.7) |
| <b>Serotypes common to both vaccines<sup>b</sup></b> |               |     |                     |             |     |                     |
| Age 11–13 mo                                         | 25            | 514 | 4.9 (3.2 to 7.1)    | 12          | 257 | 4.7 (2.4 to 8.0)    |
| Age 14–16 mo                                         | 15            | 514 | 2.9 (1.6 to 4.8)    | 7           | 257 | 2.7 (1.1 to 5.5)    |
| Age 18–20 mo                                         | 19            | 514 | 3.7 (2.2 to 5.7)    | 6           | 258 | 2.3 (0.9 to 5.0)    |
| Age 23–25 mo                                         | 9             | 512 | 1.8 (0.8 to 3.3)    | 6           | 257 | 2.3 (0.9 to 5.0)    |
| Across all visits                                    | 59            | 515 | 11.5 (8.8 to 14.5)  | 27          | 258 | 10.5 (7.0 to 14.9)  |
| <b>Serotype 19A</b>                                  |               |     |                     |             |     |                     |
| Age 11–13 mo                                         | 29            | 514 | 5.6 (3.8 to 8.0)    | 16          | 257 | 6.2 (3.6 to 9.9)    |
| Age 14–16 mo                                         | 28            | 514 | 5.4 (3.6 to 7.8)    | 16          | 257 | 6.2 (3.6 to 9.9)    |
| Age 18–20 mo                                         | 45            | 514 | 8.8 (6.5 to 11.5)   | 22          | 258 | 8.5 (5.4 to 12.6)   |
| Age 23–25 mo                                         | 22            | 512 | 4.3 (2.7 to 6.4)    | 14          | 257 | 5.4 (3.0 to 9.0)    |
| Across all visits                                    | 114           | 515 | 22.1 (18.6 to 26.0) | 65          | 258 | 25.2 (20.0 to 31.0) |

For each visit, N indicates the number of subjects with swabs cultured and n (%) indicates the number (percentage) of subjects with new acquisition of the specified bacterium. For across all visits, N indicates the number of subjects with swabs cultured after at least one visit and n (%) indicates the number (percentage) of subjects with new acquisition of the specified bacterium after at least one visit. <sup>a</sup> Data include any *S. pneumoniae* as identified by conventional culture methods, excluding nontypeable strains. <sup>b</sup> Pneumococcal serotypes common to both vaccines are serotypes 4, 6B, 9V, 14, 18C, 19F, and 23F. Abbreviations: mo, months; CI, confidence interval.

Supplementary Table 4. Serotype-specific nasopharyngeal colonisation of culturable *S. pneumoniae* in children across all visits (Total Vaccinated Cohort).

|                                          | PHiD-CV group<br>N=520 |                     | 7vCRM group<br>N=260 |                     |
|------------------------------------------|------------------------|---------------------|----------------------|---------------------|
|                                          | n                      | % (95% CI)          | n                    | % (95% CI)          |
| <b>Serotypes common to both vaccines</b> |                        |                     |                      |                     |
| 4                                        | 1                      | 0.2 (0.0 to 1.1)    | 0                    | 0.0 (0.0 to 1.4)    |
| 6B                                       | 28                     | 5.4 (3.6 to 7.7)    | 8                    | 3.1 (1.3 to 6.0)    |
| 9V                                       | 3                      | 0.6 (0.1 to 1.7)    | 4                    | 1.5 (0.4 to 3.9)    |
| 14                                       | 3                      | 0.6 (0.1 to 1.7)    | 1                    | 0.4 (0.0 to 2.1)    |
| 18C                                      | 11                     | 2.1 (1.1 to 3.8)    | 4                    | 1.5 (0.4 to 3.9)    |
| 19F                                      | 30                     | 5.8 (3.9 to 8.1)    | 15                   | 5.8 (3.3 to 9.3)    |
| 23F                                      | 25                     | 4.8 (3.1 to 7.0)    | 13                   | 5.0 (2.7 to 8.4)    |
| <b>Additional serotypes in PHiD-CV</b>   |                        |                     |                      |                     |
| 1                                        | 2                      | 0.4 (0.0 to 1.4)    | 2                    | 0.8 (0.1 to 2.8)    |
| 5                                        | 2                      | 0.4 (0.0 to 1.4)    | 1                    | 0.4 (0.0 to 2.1)    |
| 7F                                       | 2                      | 0.4 (0.0 to 1.4)    | 6                    | 2.3 (0.9 to 5.0)    |
| <b>Non-PHiD-CV serotypes<sup>a</sup></b> |                        |                     |                      |                     |
| 3                                        | 24                     | 4.6 (3.0 to 6.8)    | 17                   | 6.5 (3.9 to 10.3)   |
| 6A                                       | 44                     | 8.5 (6.2 to 11.2)   | 16                   | 6.2 (3.6 to 9.8)    |
| 6C                                       | 49                     | 9.4 (7.1 to 12.3)   | 17                   | 6.5 (3.9 to 10.3)   |
| 10A                                      | 49                     | 9.4 (7.1 to 12.3)   | 21                   | 8.1 (5.1 to 12.1)   |
| 11A                                      | 83                     | 16.0 (12.9 to 19.4) | 40                   | 15.4 (11.2 to 20.4) |
| 15B                                      | 43                     | 8.3 (6.0 to 11.0)   | 22                   | 8.5 (5.4 to 12.5)   |
| 15C                                      | 36                     | 6.9 (4.9 to 9.5)    | 24                   | 9.2 (6.0 to 13.4)   |
| 16F                                      | 66                     | 12.7 (10.0 to 15.9) | 25                   | 9.6 (6.3 to 13.9)   |
| 19A                                      | 146                    | 28.1 (24.3 to 32.2) | 80                   | 30.8 (25.2 to 36.8) |
| 21                                       | 38                     | 7.3 (5.2 to 9.9)    | 21                   | 8.1 (5.1 to 12.1)   |
| 22F                                      | 37                     | 7.1 (5.1 to 9.7)    | 16                   | 6.2 (3.6 to 9.8)    |
| 23A                                      | 50                     | 9.6 (7.2 to 12.5)   | 26                   | 10.0 (6.6 to 14.3)  |
| 23B                                      | 49                     | 9.4 (7.1 to 12.3)   | 17                   | 6.5 (3.9 to 10.3)   |
| 33F                                      | 35                     | 6.7 (4.7 to 9.2)    | 24                   | 9.2 (6.0 to 13.4)   |
| 35B                                      | 27                     | 5.2 (3.4 to 7.5)    | 18                   | 6.9 (4.2 to 10.7)   |
| 35F                                      | 35                     | 6.7 (4.7 to 9.2)    | 16                   | 6.2 (3.6 to 9.8)    |

N indicates the number of subjects with swab cultured after at least one visit and n (%) indicates the number (percentage) of subjects with swabs positive for the specified serotype after at least one visit. Abbreviation: CI, confidence interval. <sup>a</sup> Data included are all serotypes not included in PHiD-CV with a prevalence of at least 5% across visits in either group.
